# Supplementary material for: Curved aromatic corannulene as an efficient enhancer for n-type thermoelectric single-walled carbon nanotubes
Source: Royal Society of Chemistry journal article supplement (doi:10.1039/d0ta09140e), 2020-01-01
Supplement: d0ta09140e1.pdf [file d0ta09140e1.pdf]

## Electronic Supplementary Information

### Curved Aromatic Corannulene as an Efficient Enhancer for n-Type Thermoelectric Single-walled Carbon Nanotubes

*Mihoko Yamada,\* Chigusa Goto, Hiroyo Aoki, Yoshiyuki Nonoguchi and Tsuyoshi Kawai\**

*Division of Materials Science, Nara Institute of Science and Technology (NAIST)*

*Ikoma 630-0192, Japan*

*Corresponding Authors: tkawai@ms.naist.jp*

### Table of Contents

**Table S1.** The evaluated values of the films n-type-doped with/without corannulene.

**Table S2.** The evaluated values of the films n-type-doped with/without pyrene.

**Figure S1.** UV-vis-NIR of the films before and after n-type doping with corannulene.

**Figure S2.** UV-vis-NIR of the films before and after n-type doping with pyrene.

**Figure S3.** EPR spectra of the films n-type-doped with corannulene or pyrene.

**Table S1.** The evaluated values of the films n-type-doped with/without corannulene. The n-type doping conditions are [benzo-18-crown-6-ether] = 10 mM, [KOH] = 10 mM, in *n*-BuOH (3 mL) at 298 K for 2 h. The values of Abs<sub>1660</sub> were evaluated from UV-vis-NIR spectra.

| Entry | [corannulene] / mM | Thickness / $\mu\text{m}$ | Electrical conductivity $\sigma / \text{S cm}^{-1}$ | Seebeck coefficient $\alpha / \mu\text{V K}^{-1}$ | PF / $\mu\text{W m}^{-1} \text{K}^{-2}$ | $\Delta\text{PF} / \mu\text{W m}^{-1} \text{K}^{-2}$ | Abs <sub>1660</sub> before doped | Abs <sub>1660</sub> after doped | n-type-doped level $\Delta\text{Abs}_{1660}$ | Differential n-type-doped level $\Delta\Delta\text{Abs}_{1660}$ |
|-------|--------------------|---------------------------|-----------------------------------------------------|---------------------------------------------------|-----------------------------------------|------------------------------------------------------|----------------------------------|---------------------------------|----------------------------------------------|-----------------------------------------------------------------|
| 1-1   | 0                  | 0.30                      | 14.4                                                | -285                                              | 117                                     |                                                      | 1.596                            | 1.422                           | 0.174                                        |                                                                 |
| 1-2   | 0.1                | 0.30                      | 30.4                                                | -233                                              | 164                                     | 47                                                   | 1.420                            | 1.130                           | 0.29                                         | 0.116                                                           |
| 2-1   | 0                  | 0.34                      | 22.9                                                | -230                                              | 121                                     |                                                      | 1.343                            | 1.179                           | 0.164                                        |                                                                 |
| 2-2   | 0.4                | 0.34                      | 41.1                                                | -187                                              | 143                                     | 22                                                   | 1.645                            | 1.322                           | 0.323                                        | 0.159                                                           |
| 3-1   | 0                  | 0.33                      | 22.6                                                | -167                                              | 62.8                                    |                                                      | 1.226                            | 1.104                           | 0.122                                        |                                                                 |
| 3-2   | 0.7                | 0.33                      | 40.8                                                | -193                                              | 151                                     | 88.2                                                 | 1.163                            | 0.937                           | 0.226                                        | 0.104                                                           |
| 4-1   | 0                  | 0.40                      | 6.32                                                | -307                                              | 59.5                                    |                                                      | 1.130                            | 0.916                           | 0.214                                        |                                                                 |
| 4-2   | 1                  | 0.40                      | 21.8                                                | -224                                              | 109                                     | 49.5                                                 | 1.172                            | 0.868                           | 0.304                                        | 0.09                                                            |

**Table S2.** The evaluated values of the films n-type-doped with/without pyrene. The n-type doping conditions are [benzo-18-crown-6-ether] = 10 mM, [KOH] = 10 mM, in *n*-BuOH (3 mL) at 298 K for 2 h. The values of Abs<sub>1660</sub> were evaluated from UV-vis-NIR spectra.

| Entry | [pyrene] / mM | Thickness / $\mu\text{m}$ | Electrical conductivity $\sigma / \text{S cm}^{-1}$ | Seebeck coefficient $\alpha / \mu\text{V K}^{-1}$ | PF / $\mu\text{W m}^{-1} \text{K}^{-2}$ | $\Delta\text{PF} / \mu\text{W m}^{-1} \text{K}^{-2}$ | Abs <sub>1660</sub> before doped | Abs <sub>1660</sub> after doped | n-type-doped level $\Delta\text{Abs}_{1660}$ | Differential n-type-doped level $\Delta\Delta\text{abs}_{1660}$ |
|-------|---------------|---------------------------|-----------------------------------------------------|---------------------------------------------------|-----------------------------------------|------------------------------------------------------|----------------------------------|---------------------------------|----------------------------------------------|-----------------------------------------------------------------|
| 1-1   | 0             | 0.42                      | 7.75                                                | -273                                              | 57.9                                    |                                                      | 1.341                            | 1.218                           | 0.123                                        |                                                                 |
| 1-2   | 0.1           | 0.42                      | 6.7                                                 | -276                                              | 50.9                                    | -7                                                   | 1.169                            | 0.799                           | 0.37                                         | 0.247                                                           |
| 2-1   | 0             | 0.38                      | 10.4                                                | -238                                              | 58.5                                    |                                                      | 1.18                             | 1.125                           | 0.055                                        |                                                                 |
| 2-2   | 0.4           | 0.38                      | 3.55                                                | -215                                              | 16.4                                    | -42.1                                                | 1.066                            | 0.933                           | 0.133                                        | 0.078                                                           |
| 3-1   | 0             | 0.30                      | 4.92                                                | -319                                              | 50.1                                    |                                                      | 1.235                            | 1.048                           | 0.187                                        |                                                                 |
| 3-2   | 0.7           | 0.30                      | 9.2                                                 | -282                                              | 73.3                                    | 23.2                                                 | 1.171                            | 1.079                           | 0.092                                        | -0.095                                                          |
| 4-1   | 0             | 0.40                      | 5.17                                                | -324                                              | 54.2                                    |                                                      | 1.513                            | 1.273                           | 0.24                                         |                                                                 |
| 4-2   | 1             | 0.40                      | 1.52                                                | -411                                              | 25.6                                    | -28.6                                                | 1.513                            | 1.330                           | 0.183                                        | -0.057                                                          |

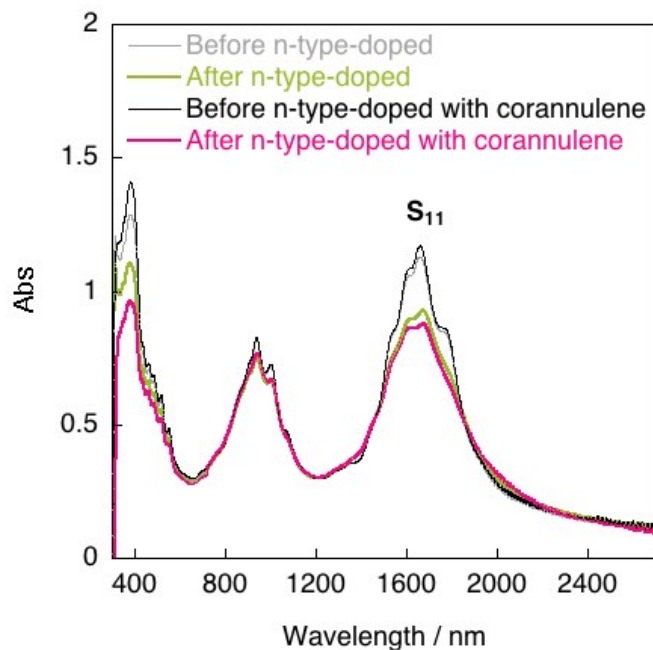

**Figure S1.** UV-vis-NIR absorption spectra of the films before and after n-type-doped with/without corannulene (1.0 mM). The n-type doping conditions are [benzo-18-crown-6-ether] = 10 mM, [KOH] = 10 mM, in *n*-BuOH (3 mL) at 298 K for 2 h.

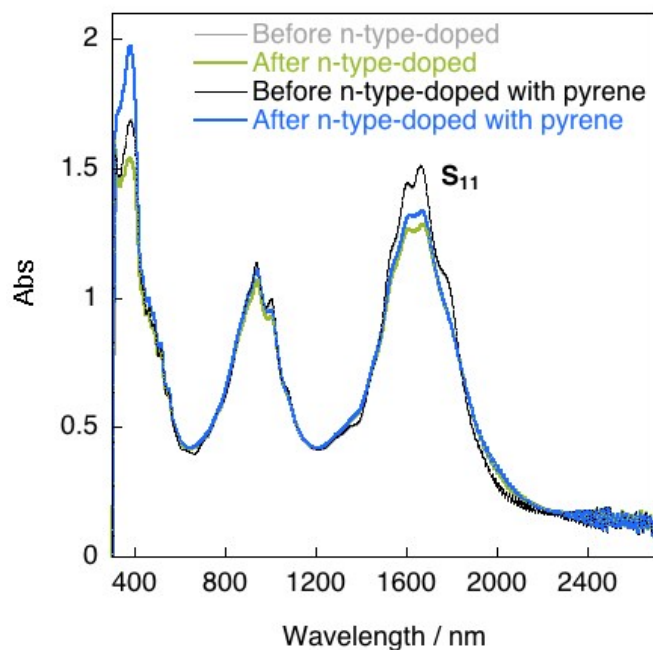

**Figure S2.** UV-vis-NIR absorption spectra of the films before and after n-type-doped with/without pyrene (1.0 mM). The n-type doping conditions are [benzo-18-crown-6-ether] = 10 mM, [KOH] = 10 mM, in *n*-BuOH (3 mL) at 298 K for 2 h.

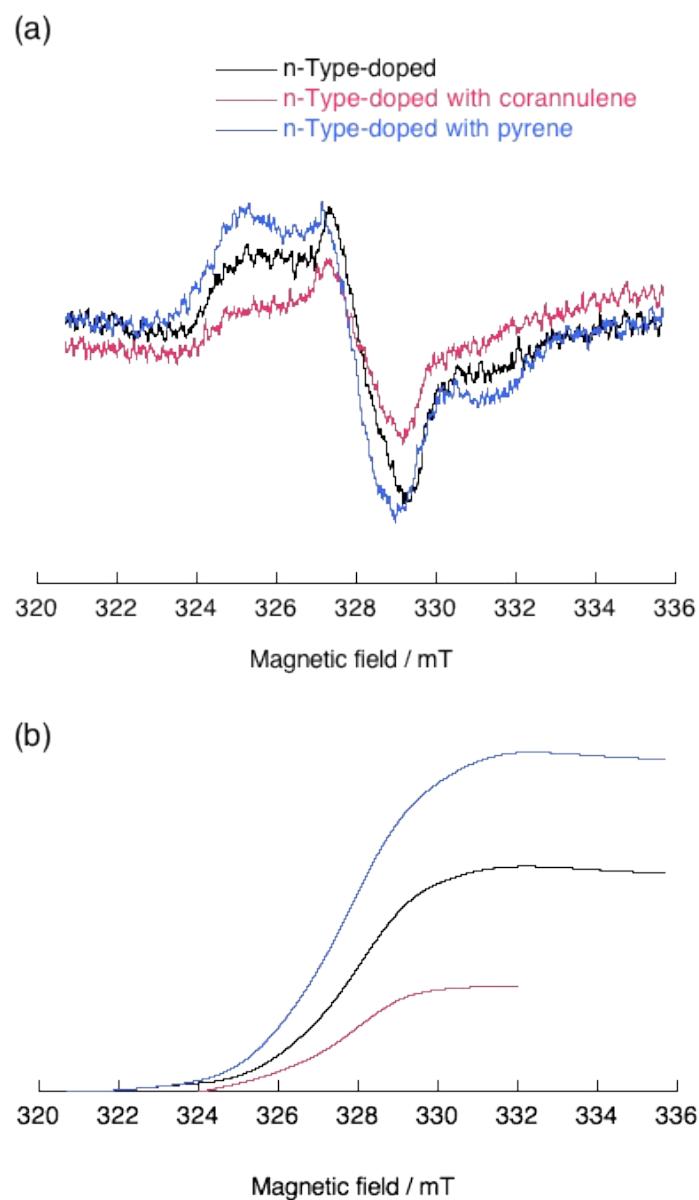

**Figure S3.** (a) EPR spectra and (b) their double integration of the film n-type doped with corannulene (1 mM), pyrene (1 mM), or none of them. The n-type doping conditions are [benzo-18-crown-6-ether] = 10 mM, [KOH] = 10 mM, in *n*-BuOH (3 mL) at 298 K for 5 min. The films were sunk in the 0.2 M DMPO *n*-BuOH solution under N<sub>2</sub> atmosphere and observed by EPR.
